# Supplementary material for: Cytochrome P450 Complement May Contribute to Niche Adaptation in Serpula Wood-Decay Fungi
Source: MDPI journal article supplement (doi:10.3390/jof8030283), 2022-03-10
Supplement: s1 [file s1]

Supplementary Information for:

**Cytochrome P450 complement may contribute to niche adaptation in *Serpula* wood decay fungi**, Cowan RC, Skrede I and Moody SC. Corresponding author: SC Moody, Kingston University, s.c.moody@kingston.ac.uk

Figure S1. A simplified sketch of the phylogenetic relationships of *Serpula himantioides*, *S. lacrymans* var. *lacrymans* and *S. lacrymans* var. *shastensis*, and their placement in the Serpulaceae, based on phylogenies and molecular dating in Skrede et al. (2011).

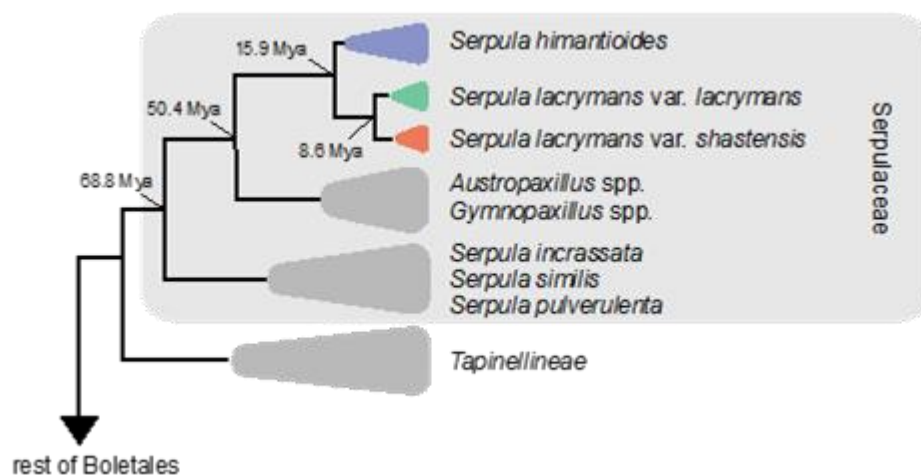

Table S1. Classification of predicted P450s for each of the three *Serpula* species. Family/subfamily nomenclature was assigned as per the P450 Nomenclature Committee Guidelines (Nelson, 2006).

| Family<br>(subfamily) | Species                                                 |                                                          |                                              |
|-----------------------|---------------------------------------------------------|----------------------------------------------------------|----------------------------------------------|
|                       | <i>Serpula lacrymans</i> var. <i>lacrymans</i><br>(SLL) | <i>Serpula lacrymans</i> var. <i>shastensis</i><br>(SHA) | <i>Serpula himantoides</i><br>(SH)           |
| 502                   | 1<br>(A: 1)                                             | 1<br>(A: 1)                                              | 1<br>(A: 1)                                  |
| 5032                  | 1<br>(B: 1)                                             | 1<br>(B: 1)                                              | 0                                            |
| 5035                  | 2<br>(AF: 2)                                            | 2<br>(AF: 2)                                             | 2<br>(AF: 2)                                 |
| 5036                  | 2<br>(N/A: 2)                                           | 1<br>(N/A: 1)                                            | 1<br>(N/A: 1)                                |
| 5037                  | 11<br>(B: 8, N/A: 3)                                    | 8<br>(B: 7, N/A: 1)                                      | 8<br>(B: 8)                                  |
| 504                   | 1<br>(N/A: 1)                                           | 1<br>(N/A: 1)                                            | 1<br>(N/A: 1)                                |
| 5065                  | 2<br>(B: 1, NS: 1)                                      | 1<br>(B: 1)                                              | 2<br>(B: 1, NS: 1)                           |
| 51                    | 1<br>(F: 1)                                             | 1<br>(F: 1)                                              | 1<br>(F: 1)                                  |
| 512                   | 10<br>(AV: 5, AW: 1, N/A: 4)                            | 8<br>(AV: 6, AW: 1, N/A: 1)                              | 9<br>(AV: 5, AW: 1, N/A: 3)                  |
| 5136                  | 4<br>(L: 4)                                             | 4<br>(L: 4)                                              | 1<br>(N/A: 1)                                |
| 5137                  | 2<br>(A: 1, F: 1)                                       | 3<br>(A: 1, F: 1, N/A: 1)                                | 7<br>(A: 1, F: 5, N/A: 1)                    |
| 5138                  | 1<br>(A: 1)                                             | 1<br>(A: 1)                                              | 1<br>(A: 1)                                  |
| 5139                  | 1<br>(D: 1)                                             | 1<br>(D: 1)                                              | 2<br>(D: 1, NS: 1)                           |
| 5140                  | 1<br>(A: 1)                                             | 1<br>(A: 1)                                              | 1<br>(A: 1)                                  |
| 5141                  | 3<br>(A: 3)                                             | 3<br>(A: 3)                                              | 2<br>(A: 2)                                  |
| 5142                  | 2<br>(N/A: 2)                                           | 2<br>(N/A: 2)                                            | 2<br>(N/A: 2)                                |
| 5143                  | 0                                                       | 1<br>(N/A: 1)                                            | 1<br>(N/A: 1)                                |
| 5144                  | 22<br>(BW: 11, BX: 1, C: 1, N/A: 9)                     | 19<br>(BW: 5, BX: 1, C: 1, N/A: 12)                      | 30<br>(BW: 10, BX: 1, CJ: 1, DZ: 1, N/A: 17) |

|      |                                  |                                 |                            |
|------|----------------------------------|---------------------------------|----------------------------|
| 5148 | 1<br>(A: 1)                      | 1<br>(A: 1)                     | 0                          |
| 5149 | 0                                | 1<br>(N/A: 1)                   | 0                          |
| 5150 | 2<br>(AG: 2)                     | 2<br>(AG: 2)                    | 3<br>(AG: 2, N/A: 1)       |
| 5151 | 2<br>(A: 1, E: 1)                | 2<br>(A: 1, E: 1)               | 1<br>(E: 1)                |
| 5152 | 11<br>(A: 1, G: 6, H: 2, N/A: 2) | 9<br>(A: 1, G: 5, H: 2, N/A: 1) | 16<br>(G: 8, H: 6, N/A: 2) |
| 5153 | 1<br>(B: 1)                      | 1<br>(B: 1)                     | 1<br>(B: 1)                |
| 5154 | 3<br>(H: 1, N/A: 2)              | 3<br>(H: 1, N/A: 2)             | 3<br>(H: 2, N/A: 1)        |
| 5156 | 1<br>(A: 1)                      | 1<br>(A: 1)                     | 1<br>(A: 1)                |
| 5158 | 0                                | 0                               | 1<br>(N/A: 1)              |
| 53   | 1<br>(C: 1)                      | 1<br>(C: 1)                     | 1<br>(C: 1)                |
| 5340 | 3<br>(A: 3)                      | 2<br>(A: 2)                     | 5<br>(A: 5)                |
| 5341 | 1<br>(B: 1)                      | 1<br>(B: 1)                     | 1<br>(N/A: 1)              |
| 5347 | 1<br>(N/A: 1)                    | 0                               | 1<br>(N/A: 1)              |
| 5348 | 4<br>(N/A: 4)                    | 4<br>(N/A: 4)                   | 1<br>(N/A: 1)              |
| 5350 | 0                                | 0                               | 1<br>(N/A: 1)              |
| 5351 | 0                                | 0                               | 1<br>(N/A: 1)              |
| 5352 | 1<br>(A: 1)                      | 1<br>(A: 1)                     | 2<br>(A: 2)                |
| 5363 | 0                                | 1<br>(N/A: 1)                   | 2<br>(N/A: 2)              |
| 5364 | 2<br>(N/A: 2)                    | 1<br>(N/A: 1)                   | 1<br>(N/A: 1)              |
| 5365 | 4<br>(C: 2, N/A: 2)              | 5<br>(C: 2, N/A: 3)             | 6<br>(C: 5, N/A: 1)        |
| 5416 | 0                                | 0                               | 1<br>(F: 1)                |
| 5418 | 1<br>(B: 1)                      | 1<br>(B: 1)                     | 1<br>(B: 1)                |

|                       |                   |             |                   |
|-----------------------|-------------------|-------------|-------------------|
| 5430                  | 1<br>(N/A: 1)     | 0           | 0                 |
| 5671                  | 3<br>(B: 3)       | 3<br>(B: 3) | 1<br>(B: 1)       |
| 5747                  | 1<br>(A: 1)       | 1<br>(A: 1) | 0                 |
| 6005                  | 1<br>(A: 1)       | 1<br>(A: 1) | 1<br>(A: 1)       |
| 61                    | 1<br>(A: 1)       | 1<br>(A: 1) | 1<br>(A: 1)       |
| 63                    | 7<br>(A: 6, B: 1) | 5<br>(A: 5) | 6<br>(A: 5, B: 1) |
| Novel                 | 15                | 14          | 11                |
| Number of families    | 39                | 40          | 42                |
| Number of subfamilies | 40                | 38          | 35                |
| Total number of P450s | 135               | 121         | 142               |

Table S2. Sequence motifs for the putative P450s identified in *Serpula lacrymans* var. *lacrymans* (SLL) SL200. Multiple sequence alignment was carried out using Clustal Omega and sequence position (indicating the position of the first aa) is given alongside. Dashes are used to indicate absence/ incomplete region of a sequence.

| Sequence        | AGXDTT     | EXXR     | PER        | FXXGXRXCXG     | Family  |
|-----------------|------------|----------|------------|----------------|---------|
| SL200v200000479 | AGTDTV 300 | ESLR 358 | FRPERW 414 | FSRGPRSCIG 434 | CYP5142 |
| SL200v200000480 | GGSDTT 298 | EILR 355 | FNPERF 407 | FGYGRRICPG 429 | CYP5037 |
| SL200v200000535 | AGHETS 348 | ETLR 411 | FKPERF 482 | FSAGPRACIG 503 | CYP5671 |
| SL200v200000541 | GGSHST 314 | EVL 371  | FNPDRF 424 | FGAGRRICPG 453 | CYP5148 |
| SL200v200000542 | AGSDTQ 294 | EVL 351  | FNPQRY 404 | FGFGRRACPG 420 | CYP5747 |
| SL200v200000550 | ---        | EGVR 400 | YRPSRW 465 | HPTGPRACIG 539 | CYP5154 |
| SL200v200000553 | AGHETT 454 | EGLR 510 | YRPSRW 575 | FSVGPRACIG 611 | CYP5154 |
| SL200v200000615 | AGQHTS 322 | ETLR 383 | WDPSRW 445 | FGAGRHCIG 490  | CYP51   |
| SL200v200000639 | ISIQVL 294 | ESLR 350 | FDPSRF 404 | FGHGKNACPG 433 | CYP512  |
| SL200v200000824 | AAIHTS 296 | EIQR 352 | ---        | FGHGRHACPG 404 | CYP512  |
| SL200v200001221 | AGADTT 194 | EVMR 251 | FKPERF 304 | FGYGRRICPG 323 | CYP5037 |
| SL200v200001226 | GGTDTT 318 | EVVR 375 | FKPERF 427 | FGFGRRICPD 446 | CYP5037 |
| SL200v200001269 | AASDTT 309 | ETLR 366 | FKPERF 419 | FGFGRRVCIG 439 | CYP5144 |
| SL200v200001271 | AASETT 334 | ETLR 391 | FKPERF 442 | FGFGRRVCIG 462 | CYP5144 |
| SL200v200001362 | AGHETT 170 | ETLR 226 | FRPERW 293 | FLSGSRGCIG 318 | CYP5138 |
| SL200v200001695 | AGAETT 296 | EVMR 353 | FKPE - 406 | - - RICPG 410  | CYP5037 |
| SL200v200001696 | AGSDTT 301 | ETLR 358 | FKPERF 411 | FGFGRRICVG 432 | CYP5144 |
| SL200v200001989 | AGAESE 295 | EVL 352  | FWPERF 405 | FGYGRRICPG 429 | CYP5144 |
| SL200v200002015 | ASIHQT 296 | EVMR 358 | FRPERW 411 | FGLGRWACPG 434 | CYP5347 |
| SL200v200002128 | AGRDTT 363 | ETLR 420 | FDPDRF 480 | FNAGPRICLG 504 | CYP63   |
| SL200v200002158 | SAIHTS 296 | ETLR 352 | FDPFRF 406 | FGHGKNACPG 435 | CYP512  |
| SL200v200002355 | AASEMT 282 | ETFR 339 | FKPERF 392 | FGFGRRVCIG 413 | CYP5144 |
| SL200v200002605 | AGHETT 321 | ETLR 378 | FKPSRF 439 | FSAGHRGCVG 456 | CYP5141 |
| SL200v200002606 | AGHETT 321 | ETLR 378 | FKPSRF 439 | FSAGYRGCVG 456 | CYP5141 |
| SL200v200002613 | AGHETT 322 | EALR 379 | FKPSRF 440 | FSAGHRGCVG 457 | CYP5141 |
| SL200v200002698 | AGSDTT 293 | ESLR 350 | FEPQRW 403 | FGFGRRVCIG 424 | CYP5152 |
| SL200v200002699 | AGSDTT 295 | ESFR 350 | FQPERW 405 | YGFGRVCAG 426  | CYP5152 |
| SL200v200002700 | AGSDTT 295 | ETFR 352 | FQPERW 405 | YGFGRVCAG 426  | CYP5152 |
| SL200v200002987 | AGRDTT 366 | ETLR 423 | FDPDRF 483 | FNAGPRICLG 507 | CYP63   |
| SL200v200003041 | GAAETT 233 | ESHR 290 | FVPERF 343 | FGFGRRVCAG 364 | CYP5144 |
| SL200v200003050 | AGSDTT 293 | ESFR 350 | FEPQRW 403 | YGFGRACPG 424  | CYP5152 |
| SL200v200003108 | AAAETS 302 | ETLR 359 | FKPERF 423 | FGFGRRICVG 433 | CYP5144 |

|                 |             |           |             |                 |         |
|-----------------|-------------|-----------|-------------|-----------------|---------|
| SL200v200003109 | GGAETT 155  | ETLR 212  | FKPERF 265  | FGFGRRICPG 286  | CYP5144 |
| SL200v200003174 | AGSETT 314  | ETLR 371  | FKPERF 424  | YGFGRRICVG 445  | CYP5144 |
| SL200v200003180 | AGADTI 374  | ESFR 431  | FNPLRW 484  | YGFGQRACPG 505  | CYP5152 |
| SL200v200003187 | AGTDTT 325  | EVFR 384  | FMPERF 437  | FGFGRRKCPG 459  | CYP5065 |
| SL200v200003372 | AAAETT 304  | ETLR 361  | FKPERF 414  | FGFGRRICVG 434  | CYP5144 |
| SL200v200003373 | AAAETT 302  | ETLR 359  | FEPDRF 412  | FGFGRRICVG 432  | CYP5144 |
| SL200v200003734 | ANIDVT 326  | ESAR 384  | FRPERF 438  | YGLGPRQCLG 458  | Novel   |
| SL200v200003736 | ANVDVS 315  | ETLR 369  | FKPERF 424  | FGFGPRQCLG 444  | Novel   |
| SL200v200003795 | GGADTT 298  | EVL R 355 | FDPERF 408  | FGFGRRICPG 430  | CYP5037 |
| SL200v200003820 | AGSDTL 304  | ETLR 362  | FAPERW 416  | FSKGPRGCLG 436  | CYP5142 |
| SL200v200003844 | AAMDTT 326  | ETLR 383  | WKPERW 450  | FLGGGRACIG 478  | CYP5150 |
| SL200v200003848 | AAMDTT 325  | ETLR 382  | WKPERW 449  | FLGGGRSCIG 477  | CYP5150 |
| SL200v200004057 | GGMDTN 297  | EVFR 354  | FSPERY 407  | FGFGRRVCPG 427  | CYP5037 |
| SL200v200004363 | AGSDTT 426  | EALR 485  | FRPERW 540  | FSFGPRACVG 560  | CYP53   |
| SL200v200004475 | IGTAPS 302  | ETVR 372  | WNP ARW 424 | WGIGMHPCLG 447  | Novel   |
| SL200v200004476 | AGHETT 316  | EAMR 373  | FEPSRW 436  | FGHGPRVCIG 454  | Novel   |
| SL200v200004478 | AGHETS 320  | ETMR 377  | FEPSRW 440  | FSHGTRACIG 458  | Novel   |
| SL200v200004519 | AGHETT 318  | ETLR 380  | YRPERW 447  | FGSGPHACIG 474  | CYP5430 |
| SL200v200004605 | TANSDS 282  | ETLR 338  | FEPFRF 392  | FGLGRHACPG 421  | CYP512  |
| SL200v200004606 | IGTN TT 288 | ETVR 358  | WDPARW 410  | WGAGLHPCHG 433  | Novel   |
| SL200v200004611 | TGTITT 288  | ETNR 358  | WDPSRW 410  | WGVGLHPCLG 433  | Novel   |
| SL200v200004878 | GAIHVC 332  | ETLR 410  | FDPFRF 483  | FGHRSACPG 512   | CYP512  |
| SL200v200005082 | AGHETT 352  | ESLR 409  | FRPERW 462  | FIAGPHACIG 483  | CYP5032 |
| SL200v200005092 | AGRDTT 363  | ETLR 420  | FDPDRF 480  | FNAGPRICLG 504  | CYP63   |
| SL200v200005229 | AGHETS 350  | ETLR 413  | FKPARF 484  | FSAGPRGCIG 505  | CYP5671 |
| SL200v200005309 | AGTGTT 303  | ELFR 360  | FHPERH 413  | FGFGRRICPG 434  | CYP5144 |
| SL200v200005324 | AGFETT 309  | ETMR 366  | FLPERH 419  | FGFGRRICPG 442  | CYP5144 |
| SL200v200005509 | VGHETT 316  | EGLR 370  | FKPERW 437  | FCDGPRMCIG 464  | CYP5341 |
| SL200v200005511 | AGHETS 349  | ETLR 411  | FKPARF 482  | FSGGPRSCIG 503  | CYP5671 |
| SL200v200005559 | AGSDTI 303  | EVHR 360  | FRPERY 414  | FGFGRRLC PG 437 | CYP5348 |
| SL200v200005560 | AGSDTI 305  | EVHR 362  | FRPERF 416  | FGFGRRICPG 439  | CYP5348 |
| SL200v200005646 | AGSDTV 275  | EVHR 332  | FRPERF 372  | FGFGRRVCPG 395  | CYP5348 |
| SL200v200005647 | AGSDTI 306  | EVHR 363  | FRPERF 417  | FGFGRRACPG 440  | CYP5348 |
| SL200v200005714 | AGHDTT 307  | EALR 366  | FRPERF 419  | FNGGPRRCPA 440  | CYP5365 |
| SL200v200005716 | AGHDTT 294  | ETLR 353  | FRPERF 406  | FSTGPRQCPA 427  | CYP5365 |
| SL200v200005717 | AGHETT 289  | ESLR 348  | FRPERF 401  | FSSGPRQCPA 421  | CYP5365 |

|                 |            |          |            |                |         |
|-----------------|------------|----------|------------|----------------|---------|
| SL200v200005784 | ASQDAM 311 | ESMR 370 | LSPERW 423 | FGSGPHKCIG 445 | CYP61   |
| SL200v200005796 | AGSDST 347 | ETLR 408 | FNPDRW 478 | FSFGPHACPG 504 | CYP5151 |
| SL200v200005855 | TAIHSS 297 | ETLR 353 | FNPFRF 407 | FGHGRGSCPG 436 | CYP512  |
| SL200v200005882 | AGHETT 327 | ETLR 382 | FKPERW 449 | FLGGPRACIG 474 | CYP5139 |
| SL200v200005901 | AASESS 305 | ETLR 362 | FRPERF 415 | FGFGRRNCVG 436 | CYP5144 |
| SL200v200005919 | AASETS 302 | ETLR 359 | FKPERF 412 | FGFGRRVCVG 433 | CYP5144 |
| SL200v200005965 | AGGDTT 370 | ETLR 427 | FDPDRF 486 | FNAGPRICLG 510 | CYP63   |
| SL200v200005966 | AGRDTT 367 | ETLR 424 | FDPDRF 483 | FNAGPRICLG 507 | CYP63   |
| SL200v200006063 | ---        | EVL 263  | FDPFRF 318 | FGYGRKCV 335   | CYP5153 |
| SL200v200006068 | ATIHTL 321 | ESLR 377 | FDGFRF 431 | FGYGLACPG 457  | Novel   |
| SL200v200006288 | GGSETT 304 | ESFR 361 | FKPERF 414 | FGFGRRICVG 435 | CYP5144 |
| SL200v200006340 | AGHETT 397 | EVL 459  | FDPERW 526 | FSGGIRSCIG 552 | CYP5137 |
| SL200v200006406 | AGYETT 330 | EVL 385  | FNPFRW 452 | FSDGPRTCLG 479 | CYP5340 |
| SL200v200006407 | AGYETT 332 | ETLR 388 | FNPDRW 455 | FADGPRTCLG 482 | CYP5340 |
| SL200v200006776 | AGSDTT 337 | EVL 403  | FDPDRW 472 | FSAGPRSCIG 497 | CYP5151 |
| SL200v200006919 | GGSDTT 298 | EVL 355  | FNPDRF 408 | FGFGRRICPG 430 | CYP5037 |
| SL200v200006949 | AGARAT 293 | ETLR 367 | FDPGRK 419 | WGGGKTICLG 436 | CYP5156 |
| SL200v200007054 | ASIDTT 305 | ECLR 362 | FKPERY 415 | FGFGRRRCPG 440 | CYP502  |
| SL200v200007149 | GGADTT 299 | EVL 356  | FDPFRF 409 | FGFGRRICPG 431 | CYP5037 |
| SL200v200007165 | AGTDTM 315 | EGLR 373 | FLPDRW 436 | FGMGSRACG 461  | CYP5140 |
| SL200v200007241 | AAIHTS 296 | EAQR 352 | FQPRF 406  | FGHGRHACPG 436 | CYP512  |
| SL200v200007306 | TAIHTS 330 | ETLR 386 | FVPFRF 440 | FGHGRNACPG 469 | CYP512  |
| SL200v200007502 | AGHETT 352 | EGVR 408 | YRPSRW 473 | FSVGPRACIG 503 | CYP5154 |
| SL200v200007515 | GGSDTT 180 | ECMR 237 | FDPVR 290  | YGFGRICPG 320  | CYP5037 |
| SL200v200007696 | AGSDTS 296 | ETLR 353 | FNPFRW 406 | FGFGRRSCPG 427 | CYP5152 |
| SL200v200007697 | AGSDTT 404 | ETLR 461 | FNPQRW 514 | FGFGRRACPG 535 | CYP5152 |
| SL200v200007738 | SGSETS 327 | ETLR 384 | YKPERF 437 | FGFGRRICVG 458 | CYP5144 |
| SL200v200007739 | AASETS 274 | ETLR 331 | FKPERF 384 | FGFGRRICVG 405 | CYP5144 |
| SL200v200007879 | AAIHTS 344 | EVL 400  | FDPFRF 454 | FGYGRHACPG 484 | CYP512  |
| SL200v200007939 | AGSDTT 297 | ESFR 354 | FNPFRW 407 | FGFGRRACPG 428 | CYP5152 |
| SL200v200007997 | GGADTI 299 | EVL 355  | FKPERH 408 | FGFGRRICPG 428 | CYP5352 |
| SL200v200008105 | ---        | EALR 924 | FDASRS 976 | RGDGAFKCLG 988 | CYP6005 |
| SL200v200008363 | GGSDNT 350 | ETLR 408 | FLPERW 461 | FSSGPHGICG 485 | CYP5364 |
| SL200v200008482 | AARDTT 364 | ETLR 420 | FDPERW 486 | FSAGPRICIG 510 | CYP63   |
| SL200v200008715 | AGHETT 315 | ESLR 377 | WNPFRF 444 | FSAGIRACIG 469 | CYP5136 |
| SL200v200008723 | AGHDTT 315 | ESLR 377 | WNPFRF 444 | FSAGIRACIG 469 | CYP5136 |

|                 |            |          |            |                |         |
|-----------------|------------|----------|------------|----------------|---------|
| SL200v200008747 | ALTSNT 285 | ESLR 354 | FVATRF 417 | FGGGISVCSG 436 | Novel   |
| SL200v200008748 | AGSVNT 303 | ETIR 371 | WNPNRW 423 | WGVARFPCTG 444 | Novel   |
| SL200v200008750 | AGRDTT 363 | ETLR 420 | FDPDRF 480 | FNAGPRICLG 504 | CYP63   |
| SL200v200008769 | AGHDTT 315 | ETLR 377 | WNPNRW 444 | FSAGIRACIG 469 | CYP5136 |
| SL200v200008771 | AGSDTT 416 | EALR 475 | FWPERW 532 | FSFGPAMCVG 570 | CYP5035 |
| SL200v200008773 | AGSDTT 343 | ETLR 401 | FWPERW 458 | FSFGPANCVG 495 | CYP5035 |
| SL200v200008921 | AGADTT 294 | ETLR 351 | FDPQRW 404 | FGFGRRVCPG 425 | CYP5152 |
| SL200v200008922 | AGFDTT 293 | EALR 350 | FDPGRW 403 | FGFGRRVCPG 424 | CYP5152 |
| SL200v200009113 | CGSDTT 140 | ECMR 197 | FDPVRF 250 | YGFGRRICPG 280 | CYP5037 |
| SL200v200009122 | AGYEPV 306 | ETIR 360 | FRPERW 424 | FSFGPRGCLG 448 | CYP5418 |
| SL200v200009135 | AGHDTS 291 | ESLR 350 | FRPARF 403 | FATGPRQCPA 428 | CYP5365 |
| SL200v200009148 | AGGDTV 334 | EALR 392 | FRPQRW 458 | FSFGAFACQG 487 | Novel   |
| SL200v200009159 | AGHDTT 315 | ESLR 377 | WNPDRF 444 | FSAGIRACLG 469 | CYP5136 |
| SL200v200009245 | TNIDAT 345 | ESGR 406 | FRPDRF 460 | FGMGPRKCLG 480 | Novel   |
| SL200v200009596 | AGIETT 332 | EALR 389 | FRPERF 443 | FGFGRRICPG 463 | CYP5065 |
| SL200v200009604 | TNFDGA 313 | EAAR 377 | YRPDRF 431 | FGMGPRKCVG 451 | Novel   |
| SL200v200009660 | AGSDTT 301 | ECLR 358 | FNPQRW 411 | FGFGRRICPG 432 | CYP5152 |
| SL200v200009667 | GGADTT 337 | ETLR 394 | FNPERF 447 | FGFGRRICPG 469 | CYP5037 |
| SL200v200009815 | ASLDTF 319 | ETSR 374 | FRPERY 427 | FGAGRRKCPG 447 | CYP504  |
| SL200v200009879 | GGTETT 349 | EVLN 414 | FVPERW 490 | FSTGPRGCG 512  | Novel   |
| SL200v200009880 | A-GDNV 312 | EMLR 390 | FIPERF 450 | FGFGTTVCPG 477 | Novel   |
| SL200v200009900 | AASETT 143 | ETHR 200 | FIPERF 253 | FGFGRRVCPG 274 | CYP5144 |
| SL200v200009988 | GGSETT 308 | ESHR 365 | FMPERF 418 | FGFGRRACPG 439 | CYP5144 |
| SL200v200010018 | GGADTA 305 | ETLR 368 | FIPERF 421 | FGFGRRVCPG 444 | CYP5144 |
| SL200v200010109 | AGHDTT 315 | EVLN 377 | FNPERW 444 | FAGGIRSCIG 471 | CYP5137 |
| SL200v200010562 | TGSDDT 371 | ETLR 429 | FLPERW 482 | FSSGPHACIG 506 | CYP5364 |
| SL200v200010592 | AGSDTT 347 | EALR 412 | FWPDRW 469 | FSLGPNNCVG 508 | CYP5036 |
| SL200v200010597 | AGYETT 332 | ETLR 388 | FNPDRW 455 | FADGPRTCLG 482 | CYP5340 |
| SL200v200010667 | AGSDTT 360 | EALR 425 | FWPDRW 478 | FSLGPNNCVG 517 | CYP5036 |
| SL200v200010798 | ASLHSS 292 | ESQR 348 | FDPFRF 402 | FGYGKHACPG 432 | CYP512  |
| SL200v200011373 | SGSETS 234 | ETLR 291 | YKPERF 344 | FGFGRRVCAG 365 | CYP5144 |



Table S3. Sequence motifs for the putative P450s identified in *Serpula lacrymans* var. *shastensis* (SHA) SHA-17. Multiple sequence alignment was carried out using Clustal Omega and sequence position (indicating the position of the first aa) is given alongside. Dashes are used to indicate absence/incomplete region of a sequence.

| Sequence         | AGXDTT     | EXXR     | PER        | FXXGXRXCXG     | Family  |
|------------------|------------|----------|------------|----------------|---------|
| SH17-1v200000116 | AAMDTT 326 | ETLR 382 | WKPERW 449 | FLGGGRSCIG 477 | CYP5150 |
| SH17-1v200000121 | AAMDTT 327 | ETLR 383 | WKPERW 450 | FLGGGRACIG 478 | CYP5150 |
| SH17-1v200000144 | AGSDTL 305 | ETLR 362 | FAPERW 416 | FSKGPRGCLG 436 | CYP5142 |
| SH17-1v200000183 | AGSDTI 307 | EVHR 363 | FRPERF 417 | FGFGRRACPG 440 | CYP5348 |
| SH17-1v200000265 | AGSDTT 346 | EELR 401 | FRPERW 455 | FQFGPFGLG 479  | CYP5143 |
| SH17-1v200001146 | GGSDTT 331 | ECMR 387 | FDPVRF 440 | YGFGRRICPG 470 | Novel   |
| SH17-1v200001220 | TADHTS 296 | ETQR 352 | FNPFRF 406 | FGHGRHACPG 435 | CYP512  |
| SH17-1v200001347 | AGTDTV 361 | ESLR 419 | FRPERW 475 | FSRGPRSCIG 495 | CYP5142 |
| SH17-1v200001348 | GGSDTT 298 | EILR 355 | FNPERF 407 | FGYGRRICPG 421 | CYP5037 |
| SH17-1v200001442 | GGSDTT 385 | EVL 442  | FNPDRF 495 | FGFGRRICPG 517 | CYP5037 |
| SH17-1v200001690 | AGHDTT 307 | EALR 366 | FRPERF 429 | FNGGPRRCPA 440 | CYP5365 |
| SH17-1v200001691 | AGHDTT 294 | EALR 353 | FRPERF 406 | FSSGPRQCPA 427 | CYP5365 |
| SH17-1v200001692 | AGHDTT 294 | ETLR 353 | FRPERF 406 | FSTGPRQCPA 427 | CYP5365 |
| SH17-1v200001693 | AGHETT 286 | ESLR 345 | FRPERF 398 | FSSGPRQCPA 418 | CYP5365 |
| SH17-1v200001736 | AGSDTT 347 | EALR 406 | FRPERW 461 | FSFGPRACVG 481 | CYP53   |
| SH17-1v200001870 | AGHETT 321 | EGVR 377 | YRPSRW 442 | FSVGPRACIG 478 | CYP5154 |
| SH17-1v200001939 | AGQHTS 322 | ETLR 383 | WDPSRW 445 | FGAGRHCIG 490  | CYP51   |
| SH17-1v200001954 | AGRDNT 310 | ETLR 368 | FNPARG 429 | FGSGPRLCPG 452 | CYP5363 |
| SH17-1v200002190 | GGVDTI 304 | ELFR 361 | FRPERF 414 | FGYGRRICPG 436 | CYP5144 |
| SH17-1v200002278 | AGFETT 309 | ETMR 366 | FFPERH 419 | FGFGRRICPG 442 | CYP5144 |
| SH17-1v200002293 | AGTGTT 303 | ELFR 360 | FHPERH 413 | FGFGRRICPG 434 | CYP5144 |
| SH17-1v200002320 | AAAETS 302 | ETLR 359 | FKPERF 412 | FGFGRRICVG 433 | CYP5144 |
| SH17-1v200002469 | AGSDTQ 294 | EVL 351  | FNPQRY 404 | FGFGRRACPG 420 | CYP5747 |
| SH17-1v200002470 | GGSHST 315 | EVL 372  | FNPDRF 425 | FGAGRRICPG 454 | CYP5148 |
| SH17-1v200002478 | AGHETS 348 | ETLR 401 | FKPERF 482 | FSAGPRACIG 503 | CYP5671 |
| SH17-1v200002610 | AGHETT 352 | ESLR 409 | FRPERW 462 | FIAGPHACIG 483 | CYP5032 |
| SH17-1v200002623 | AGHDTT 321 | EALR 378 | FKPSRF 439 | FSAGHRGCVG 456 | CYP5141 |
| SH17-1v200002624 | AGHETT 321 | ETLR 378 | FKPSRF 439 | FSAGYRGCVG 456 | CYP5141 |
| SH17-1v200002631 | AGHETT 322 | EALR 379 | FKPSRF 440 | FSAGHRGCVG 457 | CYP5141 |
| SH17-1v200002856 | AGHDTT 315 | ESLR 377 | WNPNR 444  | FSAGIRACLG 469 | CYP5136 |
| SH17-1v200002865 | AGHDTT 292 | ESLR 354 | WNPNR 421  | FSAGIRACIG 446 | CYP5136 |
| SH17-1v200002869 | ---        | ESLR 338 | WNPSRF 405 | FSAGIRACIG 430 | CYP5136 |

| <b>Sequence</b>  | <b>AGXDTT</b> | <b>EXXR</b> | <b>PER</b> | <b>FXXGXRXCXG</b> | <b>Family</b> |
|------------------|---------------|-------------|------------|-------------------|---------------|
| SH17-1v200002904 | GGADTT 293    | EVVR 350    | FKPERF 403 | FGYGRRICPG 422    | CYP5037       |
| SH17-1v200002906 | GGTDTT 358    | EIVR 415    | FKPERF 468 | FGYGRRICPG 487    | CYP5037       |
| SH17-1v200003247 | AGRDTT 366    | ETLR 423    | FDPDRF 483 | FNAGPRICLG 507    | CYP63         |
| SH17-1v200003297 | AGHDTT 315    | EVLr 377    | FNPERW 444 | FAGGIRSCIG 471    | CYP5137       |
| SH17-1v200003341 | AGAESE 295    | EVLr 352    | FWPERF 405 | FGYGRRICPG 429    | CYP5144       |
| SH17-1v200003372 | ISIQVL 294    | ESLR 350    | FDPFRF 423 | FGHGKNACPG 452    | CYP512        |
| SH17-1v200003395 | AGSETT 304    | ETLR 361    | FKPERF 414 | YGFGRRICVG 435    | CYP5144       |
| SH17-1v200003683 | AGHETS 349    | ETLR 412    | FKPARF 483 | FSAGPRSCIG 504    | CYP5671       |
| SH17-1v200003685 | VGHETT 316    | EGLR 370    | FKPERW 427 | FCDGPRMCIG 464    | CYP5341       |
| SH17-1v200003715 | AGHETS 350    | ETLR 413    | FKPARF 484 | FSAGPRGCIG 505    | CYP5671       |
| SH17-1v200003823 | AGTDTM 315    | EGLR 373    | FLPDRW 436 | FGMGSRACG 461     | CYP5140       |
| SH17-1v200003843 | GGSDNT 350    | ETLR 480    | FLPERW 461 | FSSGPHGCIG 485    | CYP5364       |
| SH17-1v200003971 | AAAETT 322    | ETLR 379    | FKPERF 432 | FGFGRRICVG 452    | CYP5144       |
| SH17-1v200003972 | AAAETT 302    | ETLR 359    | FEPDRF 412 | FGFGRRICVG 432    | CYP5144       |
| SH17-1v200004141 | AASETT 334    | ETLR 391    | FKPERF 444 | FGFGRRVCIG 464    | CYP5144       |
| SH17-1v200004496 | AGSDTT 295    | ESFR 352    | FQPERW 405 | YGFGRRVCAG 426    | CYP5152       |
| SH17-1v200004497 | AGSDTT 293    | ESLR 350    | FEPQRW 403 | FGFGRRVCPG 424    | CYP5152       |
| SH17-1v200004652 | AGSDTT 336    | EVLr 402    | FDPDRW 471 | FSAGPRSCIG 496    | CYP5151       |
| SH17-1v200004702 | AGIETT 331    | EALR 368    | FRPERF 422 | FGFGRRICPG 442    | CYP5065       |
| SH17-1v200005054 | GAIHTT 297    | ETLR 353    | FDPFRF 407 | FGHGRSACPG 436    | CYP512        |
| SH17-1v200005063 | AGHDTS 291    | ESLR 350    | FRPARF 403 | FATGPRQCPA 428    | CYP5365       |
| SH17-1v200005102 | AAIHTS 295    | EVLr 351    | FDPFRF 405 | FGYGRQACPG 435    | CYP512        |
| SH17-1v200005177 | ALTSNT 285    | ESLR 354    | FLATRF 514 | FGGGISVCSG 436    | Novel         |
| SH17-1v200005178 | AGSVNT 303    | ETIR 371    | WNPNRW 423 | WGVARFPCTG 444    | Novel         |
| SH17-1v200005180 | AGRDTT 319    | ETLR 376    | FDPDRF 436 | FNAGPRICLG 460    | CYP63         |
| SH17-1v200005190 | GGTETT 350    | EVLr 415    | FVPERW 491 | FSTGPRGCY 513     | Novel         |
| SH17-1v200005191 | A-GDNV 312    | EMLR 390    | FIPERF 450 | FGFGTTVCPG 477    | Novel         |
| SH17-1v200005227 | ANVDVS 318    | ETLR 372    | FKPERF 427 | FGFGPRQCLG 447    | Novel         |
| SH17-1v200005229 | ANIDVT 297    | ESAR 355    | FRPERF 409 | YGLGPRQCLG 429    | Novel         |
| SH17-1v200005317 | GGMDTN 297    | EVFR 354    | FNPERY 407 | FGFGRRVCPG 427    | CYP5037       |
| SH17-1v200005386 | GGADTT 446    | EVLr 503    | FDPERF 556 | FGFGRRICPG 578    | CYP5037       |
| SH17-1v200005461 | GGADTA 305    | ETLR 362    | FIPERF 415 | FGFGRRVCPG 438    | CYP5144       |
| SH17-1v200005510 | ASIDTT 306    | ECLR 363    | FKPERY 416 | FGFGRRRCPG 441    | CYP502        |
| SH17-1v200005648 | AGSDTI 303    | EVHR 360    | FRPERY 414 | FGFGRRLCPG 437    | CYP5348       |
| SH17-1v200005649 | AGSDTI 305    | EVHR 362    | FRPERF 416 | FGFGRRVCPG 439    | CYP5348       |
| SH17-1v200005766 | TNFDGA 313    | EAAR 377    | YRPDRF 431 | FGMGPRKCVG 451    | Novel         |
| SH17-1v200005983 | AGHETT 319    | EVLr 381    | FNPDRW 448 | FLGGIRSCIG 474    | CYP5137       |
| SH17-1v200006150 | AGADT- 294    | ETCR 354    | FDPQRW 456 | FGFGRRVCPG 477    | Novel         |

|                  |            |          |             |                |         |
|------------------|------------|----------|-------------|----------------|---------|
| SH17-1v200006151 | AGFDTT 293 | EALR 368 | FDPGRW 421  | FGFGRRVCPG 442 | CYP5152 |
| SH17-1v200006177 | AGSDTS 296 | ETLR 353 | FNPAPRW 406 | FGFGRRSCPG 427 | CYP5152 |
| SH17-1v200006178 | AGSDTT 296 | ETLR 353 | FNPQRW 406  | FGFGRRACPG 427 | CYP5152 |
| SH17-1v200006209 | AGADTI 373 | ESFR 430 | FNPFRW 483  | YGFGQRACPG 504 | CYP5152 |
| SH17-1v200006223 | AGHETT 345 | ETLR 400 | FKPERW 467  | FLGGPRACIG 492 | CYP5139 |
| SH17-1v200006455 | SGSETS 303 | ETLR 360 | YRPERF 413  | FGFGRRICVG 434 | CYP5144 |
| SH17-1v200006467 | AGYEPV 335 | ETIR 389 | FRPERW 453  | FSFGPRGCLG 477 | CYP5418 |
| SH17-1v200006475 | AGSDST 347 | ETLR 408 | FNPDRW 478  | FSFGPHACPG 504 | CYP5151 |
| SH17-1v200006722 | AGSDTT 293 | ESFR 350 | FEPQRW 403  | YGFGRRACPG 424 | CYP5152 |
| SH17-1v200006782 | GGVETT 262 | ETLR 319 | FDPSRF 372  | FGSGRRICPG 393 | Novel   |
| SH17-1v200006796 | AGHETT 334 | ETLR 390 | FRPERW 457  | FLSGSRGICG 482 | CYP5138 |
| SH17-1v200006993 | AGGDTV 334 | EALR 392 | FRPQRW 458  | FSFGAFACQG 487 | Novel   |
| SH17-1v200007220 | SAIHTS 296 | ETLR 352 | FDPFRF 406  | FGHGKNSCPG 435 | CYP512  |
| SH17-1v200007325 | — —        | ESIR 229 | FDPMPY 318  | FGYGRLKCVA 335 | CYP5153 |
| SH17-1v200007331 | ATIHTL 321 | ESLR 377 | FDGFRF 431  | FGYGLACPG 457  | Novel   |
| SH17-1v200007786 | AGSDTT 370 | ETLR 427 | FDPDRF 486  | FNAGPRICLG 510 | CYP63   |
| SH17-1v200007787 | AGRDTT 367 | ETLR 424 | FDPDRF 478  | FNAGPRICLG 502 | CYP63   |
| SH17-1v200007996 | AGSDTT 298 | ECLR 355 | FNPQRW 408  | FGFGRRICPG 429 | CYP5152 |
| SH17-1v200008080 | AASESS 305 | ETLR 362 | FRPERF 415  | FGFGRRNCVG 436 | CYP5144 |
| SH17-1v200008321 | AGYETT 330 | EVL 385  | FNPERW 452  | FSDGPRTCLG 479 | CYP5340 |
| SH17-1v200008322 | AGYETT 336 | ETLR 392 | FNPDRW 454  | FADGPRTCLG 481 | CYP5340 |
| SH17-1v200008342 | AGARAT 293 | ETLR 367 | FDPGRK 419  | WGGGKTICLG 436 | CYP5156 |
| SH17-1v200008432 | AGSDTT 346 | EALR 411 | FWPDRW 468  | FSLGPNNCVG 507 | CYP5036 |
| SH17-1v200008442 | AGSDTT 373 | ESFR 430 | FDPRRW 483  | FGFGRRACPG 504 | CYP5152 |
| SH17-1v200008534 | AGSDTT 343 | ETLR 401 | FWPERW 458  | FSFGPANCVG 495 | CYP5035 |
| SH17-1v200008535 | AGSDTT 349 | EALR 408 | FWPERW 465  | FSFGPAMCVG 503 | CYP5035 |
| SH17-1v200008538 | AGHDTT 315 | ESLR 377 | WNPNR 444   | FSAGIRACIG 469 | CYP5136 |
| SH17-1v200008590 | ASQDAM 311 | ESMR 370 | LTPERW 423  | FGSGPHKCIG 445 | CYP61   |
| SH17-1v200008641 | AGHETT 318 | ETLR 380 | FRPERW 447  | FGSGPHACIG 474 | CYP5137 |
| SH17-1v200008681 | AGHETS 288 | ETMR 345 | FEPSRW 408  | FSHGTRACIG 426 | Novel   |
| SH17-1v200008702 | GGADTI 299 | EVL 355  | FKPERH 408  | FGFGRRICPG 428 | CYP5352 |
| SH17-1v200008740 | ASLDTF 319 | ETSR 374 | FRPERY 427  | FGAGRRKCPG 448 | CYP504  |
| SH17-1v200008782 | GGADTT 298 | ETLR 355 | FKPERF 408  | FGFGRRICPG 430 | CYP5037 |
| SH17-1v200008802 | GGADTT 330 | EVL 387  | FNPSRF 440  | FGFGRRICPG 462 | CYP5037 |
| SH17-1v200008840 | TAIHSS 297 | ETLR 353 | FDPFRF 407  | FGHGRGSCPG 436 | CYP512  |
| SH17-1v200008906 | AGHETT 325 | EGVR 381 | YRPSRW 446  | FSVGPRACIG 476 | CYP5154 |
| SH17-1v200009038 | GGTETT 302 | ELHR 359 | FKPERF 411  | FGFGRRRCPG 431 | CYP5149 |
| SH17-1v200009190 | — —        | EALR 924 | FDASRS 976  | RGDGAFCCLG 988 | CYP6005 |
| SH17-1v200009260 | AGRDTT 363 | ETLR 420 | FDPDRF 480  | FNAGPRICLG 504 | CYP63   |
| SH17-1v200009607 | GASETT 324 | ETQR 381 | FNPQRF 434  | FGFGRRICVG 455 | CYP5144 |

|                  |            |          |            |                 |         |
|------------------|------------|----------|------------|-----------------|---------|
| SH17-1v200009616 | GATETT 307 | ESHR 364 | FVPERF 417 | FGFGRRVCAG 438  | CYP5144 |
| SH17-1v200009619 | GGSETT 308 | ESHR 365 | FMPERF 415 | FGFGRRACPG 436  | CYP5144 |
| SH17-1v200009718 | AASETS 302 | ETLR 359 | FKPERF 412 | FGFGRRVCVG 433  | CYP5144 |
| SH17-1v200009719 | AAAETS 307 | ETLR 364 | FKPERF 417 | FGFGRRICVG 438  | CYP5144 |
| SH17-1v200009777 | AAAETT 330 | ETHR 387 | FIPERF 440 | FGFGRRVCVG 461  | CYP5144 |
| SH17-1v200010294 | TNIDAT 155 | ESGR 216 | FRPERF 270 | FGMGPRKCLG 290  | Novel   |
| SH17-1v200010737 | GATETT 310 | ESHR 367 | FVPERF 420 | FGFGRRVCAG 441  | CYP5144 |
| SH17-1v200011276 | AAIHTS 296 | EAQR 352 | FQPFRF 406 | FGHGRRHACPG 436 | CYP512  |
| SH17-1v200011367 | ASLHSS 292 | ESQR 348 | FDPFRF 402 | FGYGKHACPG 432  | CYP512  |
| SH17-1v200011565 | AGHETT 316 | EALR 373 | FKPSRW 436 | FGHGPRVCIG 454  | CYP5154 |
| SH17-1v200011895 | AGTDTV 266 | EVHR 323 | FRPERF 377 | FGFGRRVCSG 400  | CYP5348 |

Table S4. Sequence motifs for the putative P450s identified in *Serpula himantoides* (SH) MUCL38935.

Multiple sequence alignment was carried out using Clustal Omega and sequence position (indicating the position of the first aa) is given alongside. Dashes are used to indicate absence/incomplete region of a sequence.

\* indicates the two halves of the large fusion protein MUCL38935v200007922.

| Sequence            | AGXDTT     | EXXR     | PER        | FXXGXRXCXG      | Family  |
|---------------------|------------|----------|------------|-----------------|---------|
| MUCL38935v200000177 | ASLHSS 293 | ESQR 350 | FDPFRF 403 | FGYGKHACPG 433  | CYP512  |
| MUCL38935v200000644 | AGSDST 349 | ETLR 413 | FNPDRW 483 | FSFGPHACPG 509  | CYP5151 |
| MUCL38935v200000652 | AGYEPV 335 | ETIR 389 | FRPERW 453 | FSFGPRGCLG 477  | CYP5418 |
| MUCL38935v200000866 | HSNDQL 641 | EALR 701 | FDASRS 753 | WGDGAFKCLG 765  | CYP6005 |
| MUCL38935v200001039 | AGHETS 340 | ETLR 396 | FRPERW 463 | FLSGSRGCIG 488  | CYP5138 |
| MUCL38935v200001199 | AGSETT 326 | ETLR 383 | FXPERF 436 | FGFGRRICVG 457  | CYP5144 |
| MUCL38935v200001391 | AGHETT 318 | ETLR 380 | FRPERW 447 | FGSGPHACIG 474  | CYP5137 |
| MUCL38935v200001461 | ASIHQT 296 | EVMR 358 | FRPERW 411 | FGLGRWACPG 434  | CYP5347 |
| MUCL38935v200001579 | AGSETT 346 | ETLR 403 | FKPERF 456 | FGFGRRVCVG 476  | CYP5144 |
| MUCL38935v200001717 | ASLDTF 319 | ETSR 374 | FRPERY 427 | FGAGRRKCPG 448  | CYP504  |
| MUCL38935v200001850 | AGSDTT 307 | ESFR 364 | FDPRRW 417 | YGFGRRACPG 438  | CYP5152 |
| MUCL38935v200001953 | ASIDTT 304 | ECLR 361 | FKPERY 414 | FGFGRRRCPPG 439 | CYP502  |
| MUCL38935v200002310 | TNFDGT 313 | EAAR 377 | YRPDRF 431 | FGMGPRKCVG 451  | Novel   |
| MUCL38935v200002399 | AAAETT 295 | ETLR 352 | FKPERF 405 | FGFGRRICIG 425  | CYP5144 |
| MUCL38935v200002400 | AAAEST 304 | ETFR 361 | FKPERF 414 | FGFGRRICVG 434  | CYP5144 |
| MUCL38935v200002401 | AAAETT 304 | ETLR 361 | FEPDRF 414 | FGFGRRICVG 434  | CYP5144 |
| MUCL38935v200002461 | GGADTI 299 | EVLK 355 | FNPERH 408 | FGFGRRICPG 428  | CYP5352 |
| MUCL38935v200002560 | AATETS 305 | ETLR 362 | FEPERF 415 | FGFGRRICVG 436  | CYP5144 |
| MUCL38935v200002635 | AGHETT 317 | EVLK 379 | FNPERW 446 | FIGGTRACIG 472  | CYP5137 |
| MUCL38935v200002950 | AASETT 306 | ELYR 363 | FIPERF 416 | FGFGRRVCVG 437  | CYP5144 |
| MUCL38935v200003212 | AGSDTV 305 | EVHR 362 | FRPERF 416 | FGFGRRVCPPG 439 | CYP5348 |
| MUCL38935v200003268 | AGHETT 327 | ETLR 382 | FKPERW 449 | FLGGPRACIG 474  | CYP5139 |
| MUCL38935v200003291 | QGSPTS 306 | EVHR 363 | FIPERF 416 | FGSGRRVCPPG 445 | CYP5416 |
| MUCL38935v200003294 | AGSDTL 134 | ETLR 192 | FVPERW 263 | FSRGPRACLG 284  | CYP5142 |
| MUCL38935v200003313 | DAN— 181   | ETMR 233 | FDPLRF 287 | FGLGKHACPG 317  | CYP512  |
| MUCL38935v200003315 | AGADTT 307 | ETHR 364 | FMPERF 417 | FGFGRRVCPPG 439 | CYP5144 |
| MUCL38935v200003469 | AGSDTT 346 | EALR 411 | FWPDRW 468 | FSLGPNNVCVG 508 | CYP5036 |
| MUCL38935v200003639 | AASESS 303 | ETLR 360 | FRPERF 413 | FGFGRRNCVG 435  | CYP5144 |
| MUCL38935v200003787 | VGHETT 316 | EGLR 370 | FKPERW 437 | FCDGPRMCIG 464  | CYP5139 |
| MUCL38935v200003948 | AGYETT 330 | EILR 385 | FNPERW 452 | FSDGPRTCLG 480  | CYP5340 |
| MUCL38935v200003949 | GGSDTT 298 | EVLK 355 | FNPERF 407 | FGYGRRICPG 430  | CYP5037 |

|                     |            |          |            |                |         |
|---------------------|------------|----------|------------|----------------|---------|
| MUCL38935v200003950 | AGTDTV 308 | ESLR 366 | FRPERW 422 | FSRGRSCIG 443  | CYP5142 |
| MUCL38935v200003995 | AGADTT 294 | ETLR 351 | FDPQRW 404 | FGFGRVCPG 426  | CYP5152 |
| MUCL38935v200003996 | AGFDTT 293 | EALR 250 | FDPGRW 403 | FGYGRVCPG 425  | CYP5152 |
| MUCL38935v200004051 | CGADTT 303 | EVVR 360 | FKPERF 413 | FGYGRICPG 433  | CYP5037 |
| MUCL38935v200004052 | GGTDTT 298 | EVVR 355 | FKPERF 408 | FGYGRICPG 428  | CYP5037 |
| MUCL38935v200004057 | AGADTT 296 | EVVR 353 | FKPERF 406 | FGYGRICPG 426  | CYP5037 |
| MUCL38935v200004058 | AGSDTT 301 | ETLR 358 | FKPERF 411 | FGFGRVCVG 433  | CYP5144 |
| MUCL38935v200004104 | AGHETT 317 | ETLR 379 | WNPTRF 446 | FSAGVRACIG 472 | CYP5136 |
| MUCL38935v200004205 | GGADTT 298 | EVL 355  | FNPDRF 408 | FGFGRICPG 431  | CYP5037 |
| MUCL38935v200004206 | GGADTT 298 | EVL 355  | FNPDRF 408 | FGFGRICPG 431  | CYP5037 |
| MUCL38935v200004236 | AAMDTT 325 | ETLR 382 | WKPERW 449 | FLGGGRSCIG 478 | CYP5150 |
| MUCL38935v200004319 | AGARAT 293 | ETLR 367 | FDPGRK 419 | WGGGKTICLG 437 | CYP5156 |
| MUCL38935v200004390 | AGHETT 325 | EGVR 381 | YRPSRW 446 | FSVGRACIG 475  | CYP5154 |
| MUCL38935v200004477 | AASETT 351 | ETLR 408 | FRPERF 461 | FGFGRXCXD 483  | CYP5144 |
| MUCL38935v200004483 | AGSDTT 347 | EALR 406 | FWPXRW 463 | FSFGPAMCVG 502 | CYP5035 |
| MUCL38935v200004562 | GGADTT 298 | ETLR 355 | FRPERF 408 | FGFGRICPG 431  | CYP5037 |
| MUCL38935v200004699 | AGRDTT 366 | ETLR 423 | FDPXRF 483 | XNAGPRICLG 508 | CYP63   |
| MUCL38935v200004767 | AGADTM 389 | ESFR 445 | FDPLRW 498 | YGFQRVCPG 520  | CYP5152 |
| MUCL38935v200004827 | AASDTT 309 | ETLR 366 | FKPERF 419 | FGFGRVCVG 440  | CYP5144 |
| MUCL38935v200005015 | AGQHTS 322 | EXLR 383 | WDPSRW 445 | FGAGRHCIG 491  | CYP51   |
| MUCL38935v200005022 | GGSDTT 328 | ECMR 385 | FDPTRF 438 | YGFGRICPG 469  | Novel   |
| MUCL38935v200005040 | AAAETT 139 | ETLR 196 | FIPDRF 249 | FGFGRICVG 270  | CYP5144 |
| MUCL38935v200005106 | AGHDTT 315 | EVL 368  | FNPDRW 444 | FAGGIRSCIG 472 | CYP5137 |
| MUCL38935v200005207 | AGRDTT 367 | ETLR 424 | FDPDRF 478 | FNAGPRICLX 503 | CYP63   |
| MUCL38935v200005208 | AGGDTT 369 | ETLR 426 | FDPDRF 485 | FNAGPRICLG 510 | CYP63   |
| MUCL38935v200005233 | PAFETM 211 | EVL 265  | FDPMRY 320 | FGFGRKICIA 338 | CYP5153 |
| MUCL38935v200005321 | AGYETT 330 | EILR 385 | FNPERW 452 | FSDGPRTCLG 480 | CYP5340 |
| MUCL38935v200005372 | AGHDTT 285 | EALR 344 | FRPERF 370 | FSSGPRRCPA 419 | CYP5365 |
| MUCL38935v200005634 | AAVETS 306 | ETLR 363 | FKPERF 416 | FGFGRICVG 438  | CYP5144 |
| MUCL38935v200005681 | AAMDTT 331 | ETLR 387 | WKPERW 454 | FSGGRSCIG 483  | CYP5150 |
| MUCL38935v200005684 | AGSETT 328 | ESLR 383 | FRPERW 449 | FSDGPRTCVG 475 | CYP5341 |
| MUCL38935v200005700 | AAAETS 121 | ETLR 178 | FKPERF 231 | FGFGRVCVG 253  | CYP5144 |
| MUCL38935v200005702 | AGSETS 303 | ETLR 360 | YKPERF 413 | FGFGRICVG 435  | CYP5144 |
| MUCL38935v200005720 | AGHDTS 291 | ESLR 350 | FRPTXF 403 | FATGPRQCPA 429 | CYP5365 |
| MUCL38935v200005779 | AGTDTT 325 | EVFR 384 | FMPERF 437 | FGFGRKCPG 459  | CYP5065 |
| MUCL38935v200005915 | AGHETT 339 | EVL 401  | FDPERW 468 | FLSGIRSCIG 495 | CYP5137 |
| MUCL38935v200005935 | AAAETS 320 | ETLR 377 | FKPERF 430 | FGFGRICVG 452  | CYP5144 |

|                       |             |           |            |                 |         |
|-----------------------|-------------|-----------|------------|-----------------|---------|
| MUCL38935v200005936   | GGAETT 278  | ETLR 335  | FKPERF 388 | FGFGRRICPG 410  | CYP5144 |
| MUCL38935v200005995   | AGSDTT 293  | ESFR 350  | FEPQRW 403 | YGFGRRACPG 425  | CYP5152 |
| MUCL38935v200006039   | AGHETT 319  | EVL R 381 | FNPDRW 448 | FLGGVRSICG 475  | CYP5137 |
| MUCL38935v200006111   | AGRDTT 364  | ETLR 421  | FDPDRF 476 | FNAGPRICLG 501  | CYP63   |
| MUCL38935v200006196   | GGADTT 298  | EVL R 355 | FNPXRF 408 | FGFGRRICPG 431  | CYP5037 |
| MUCL38935v200006275   | AAIH TS 296 | EAQR 352  | FDPFRF 406 | FGHGRHACPG 437  | CYP512  |
| MUCL38935v200006276   | AAIH TT 296 | EAQR 352  | FXPFRF 406 | FGHGRHACPG 437  | CYP512  |
| MUCL38935v200006540   | TNIDAT 352  | ESGR 413  | FRPERF 467 | FGMGPRKCLG 488  | Novel   |
| MUCL38935v200006550   | AGSDTT 291  | ETFR 348  | FDPQRW 401 | YGFGRRVCPG 423  | CYP5152 |
| MUCL38935v200006609   | AGSEPT 313  | ETLR 370  | FIPERF 423 | FGFGRRVCVG 445  | CYP5144 |
| MUCL38935v200006661   | AGHETT 321  | EALR 378  | FKPSRF 439 | FSAGYRGCVG 457  | CYP5141 |
| MUCL38935v200006662   | AGHETT 323  | ETLR 380  | FKPSRF 441 | FSAGHRGCVG 459  | CYP5141 |
| MUCL38935v200006670   | AGSDTT 99   | EELR 157  | FRPERW 211 | FQFGPFGLG 236   | CYP5143 |
| MUCL38935v200006673   | AGSDTS 347  | ETLR 404  | FNPGRW 457 | FGFGRRACPG 479  | CYP5152 |
| MUCL38935v200006728   | AGSDTS 296  | ETLR 353  | FNPERW 406 | FGFGRRSCPG 428  | CYP5152 |
| MUCL38935v200006929   | AGSDTT 347  | EALR 406  | FRPERW 461 | FSFGPRACVG 482  | CYP53   |
| MUCL38935v200007161   | GGSDNT 317  | ETLR 375  | FLPERW 428 | FSSGPHGCIG 453  | CYP5364 |
| MUCL38935v200007174   | AAVGTL 295  | ETLR 352  | FRPERF 405 | FGFGRRVCVG 427  | CYP5144 |
| MUCL38935v200007324   | AGHETT 296  | EVL R 358 | FNPDRW 425 | FLGGTRACVG 452  | CYP5137 |
| MUCL38935v200007393   | GASETT 305  | ESHR 362  | FIXERF 415 | FGFGRRICIG 437  | CYP5144 |
| MUCL38935v200007394   | AAAETT 306  | ETHR 363  | FIPERF 416 | FGFGRRVCVG 438  | CYP5144 |
| MUCL38935v200007459   | GGNDTT 329  | ESIR 385  | YRPSRW 450 | FGIGSRACIG 485  | CYP5154 |
| MUCL38935v200007461   | TGHETT 296  | ESVR 352  | YRPSRW 417 | FSVGPRTICIG 452 | CYP5154 |
| MUCL38935v200007614   | AXXETS 349  | ETLR 411  | FKPERF 482 | FSAGPRACIG 504  | CYP5671 |
| MUCL38935v200007675   | AARDTT 364  | ETLR 420  | FDPERW 486 | FSAGPRICIG 511  | CYP63   |
| MUCL38935v200007752   | AGLETT 296  | EIYR 353  | FNPSRF 406 | FGFGRRICPG 428  | CYP5144 |
| MUCL38935v200007922a* | AGADST 198  | ETLR 255  | FKPERH 308 | FGFGRRICPG 331  | CYP5144 |
| MUCL38935v200007922b* | AGFETT 883  | ETMR 940  | FLPERH 993 | FGFGRRICPG 1017 | CYP5144 |
| MUCL38935v200007938   | ASRDNT 310  | ETLR 368  | FNPARH 429 | FGSGPRLCPG 453  | CYP5363 |
| MUCL38935v200007973   | AGSDTS 295  | ETLR 352  | FDPGRW 405 | FGFGRRSCPG 427  | CYP5152 |
| MUCL38935v200007990   | AGYETT 331  | ETLR 387  | FKPERW 454 | FADGPRTCLG 482  | CYP5340 |
| MUCL38935v200008101   | TGTITT 288  | ETNR 358  | WDPARW 410 | WGVGLHPCLG 434  | Novel   |
| MUCL38935v200008111   | TANS DS 227 | ETLR 283  | FEPFRF 337 | FGLGRHACPG 437  | CYP512  |
| MUCL38935v200008267   | AGHETT 316  | EAMR 373  | FKPSRW 436 | FGHGPRVCIG 455  | Novel   |
| MUCL38935v200008268   | IGTAPS 299  | ETVR 369  | WNPARW 421 | WGIGMHPCLG 445  | Novel   |
| MUCL38935v200008271   | IGTN TT 289 | ETVR 359  | WDPARW 411 | WGAGLHPCHG 435  | Novel   |

|                     |            |          |            |                 |         |
|---------------------|------------|----------|------------|-----------------|---------|
| MUCL38935v200008329 | AGSDTT 294 | ESLR 351 | FEPGRW 404 | YGFGRXCPG 426   | CYP5152 |
| MUCL38935v200008330 | AGSDTT 295 | ESFR 352 | FXPERW 405 | YGFGRVCAG 427   | CYP5152 |
| MUCL38935v200008376 | AGAESE 314 | EVL 371  | FWPERF 424 | FGYGRMCPCG 449  | CYP5144 |
| MUCL38935v200008382 | AGRDTT 364 | ETLR 421 | YDPDRF 481 | FNAGPRICLG 506  | CYP63   |
| MUCL38935v200008433 | GGADPL 282 | ESLR 339 | FNPLRW 392 | YGFGRVCPCG 414  | CYP5152 |
| MUCL38935v200008459 | AGHETS 320 | ETMR 377 | FEPSPW 440 | FSHGTRACIG 459  | Novel   |
| MUCL38935v200008560 | ATIHTS 320 | EVL 376  | FDPFRF 430 | FGYGRHACPG 461  | CYP512  |
| MUCL38935v200008574 | SAI— 297   | ETLR 349 | FDPFRF 403 | FGHGRNACPG 433  | CYP512  |
| MUCL38935v200008750 | IGI— 298   | ETQR 350 | FTPFRF 404 | FGHGENACPG 434  | CYP512  |
| MUCL38935v200008783 | AGHDTT 296 | ESLR 355 | FRPERF 408 | FSGGPRRCPA 430  | CYP5365 |
| MUCL38935v200008784 | AGHDTT 294 | EALR 353 | FRPERF 406 | FSTGPRQCPA 428  | CYP5365 |
| MUCL38935v200008787 | AGHETT 286 | ESLR 345 | FRPERF 398 | FASGPRQCPA 419  | CYP5365 |
| MUCL38935v200008892 | GXAETT 330 | ETLR 387 | FNPERY 440 | FGFGRRICPG 463  | CYP5144 |
| MUCL38935v200008893 | AGTGTA 466 | EIFR 523 | FDPERH 576 | FGFGRRICPG 598  | CYP5144 |
| MUCL38935v200009064 | ASQDAM 323 | ESLR 382 | LTPERW 435 | FGSGPHKCIG 458  | CYP61   |
| MUCL38935v200009081 | AGSDTT 365 | ETLR 423 | FWPERW 480 | FSFGPANCVG 518  | CYP5035 |
| MUCL38935v200009217 | AAIDTS 295 | ECFR 351 | FDPYRF 405 | FGHGKHACPG 436  | CYP512  |
| MUCL38935v200009354 | AGIETX 248 | EALR 305 | FRPERF 359 | FGFGRRICPG 380  | CYP5065 |
| MUCL38935v200009457 | GASETT 305 | ESHR 362 | FKPERF 415 | FGFGRRICVG 437  | CYP5144 |
| MUCL38935v200009512 | AGTDTM 315 | EGLR 373 | FLPDRW 436 | FGTGSACCG 462   | CYP5140 |
| MUCL38935v200009531 | IGTVTT 293 | ETVR 363 | WDPARW 415 | WGIGLHPCHG 439  | Novel   |
| MUCL38935v200009532 | AAAETT 129 | ETHR 186 | FIPERF 239 | FGFGRRXCVG 261  | CYP5144 |
| MUCL38935v200009755 | AAMDTT 180 | ETLR 237 | WKPERW 304 | FLGGNRACIG 333  | CYP5150 |
| MUCL38935v200010217 | AGHETT 317 | EVL 379  | FNPDW 446  | FSGGVRSCIG 473  | CYP5137 |
| MUCL38935v200010266 | ANIDVT 327 | ESAR 385 | FRPERF 439 | YGLGPRQCLG 460  | Novel   |
| MUCL38935v200010269 | AGYETT 331 | ETLR 387 | FKPERW 454 | FADGPRTCLG 482  | CYP5340 |
| MUCL38935v200010711 | AGRDNV 303 | ETLR 361 | FDPGRY 422 | FGAGPRLCPG 446  | CYP5363 |
| MUCL38935v200010826 | GGADTI 299 | EVL 355  | FNPERH 408 | FGFGRRICPG 429  | CYP5352 |
| MUCL38935v200011081 | GGSDST 308 | ESLR 365 | FLPERY 418 | FGFGRRRCPCG 443 | CYP5351 |
| MUCL38935v200011232 | FAGDNV 301 | EMLR 380 | FIPERF 440 | FRFGTTVCPG 468  | Novel   |
| MUCL38935v200011268 | AGSDTT 293 | ESLR 350 | FEPQRW 403 | FGFGRRVCPCG 425 | CYP5152 |
| MUCL38935v200011477 | AGHETT 286 | ESLR 345 | FRPERF 398 | FASGPRQCPA 419  | CYP5365 |
| MUCL38935v200011647 | AAAETT 235 | ETHR 292 | FIPERF 345 | FGFGRRXCVG 367  | CYP5144 |
| MUCL38935v200011704 | AGSDTT 293 | ESLR 350 | FDPQRW 403 | YGFGRVCPCG 425  | CYP5152 |
| MUCL38935v200011739 | AGSDTT 293 | ESLR 353 | FEPQRW 406 | FGFGRRVCPCG 428 | CYP5152 |
| MUCL38935v200011938 | AGGEST 314 | EAMR 371 | FVPERH 424 | FGFGRRICPG 447  | CYP5158 |



|                     |            |          |            |                 |         |
|---------------------|------------|----------|------------|-----------------|---------|
| MUCL38935v200012398 | GGLETS 307 | ELFR 364 | FDPARY 417 | FGFGRRACPG 438  | CYP5350 |
| MUCL38935v200012461 | AGADTI 113 | ESFR 170 | FNPLRW 223 | YGFGKRVC PG 245 | CYP5152 |
| MUCL38935v200012513 | AGYEXT 331 | ETLR 387 | FKPERW 454 | FADGPRTCLG 482  | CYP5340 |

Table S5. The number of significantly up-regulated family members seen in the core wood transcriptome in each strain.

| Strain | Family | Number of different family members expressed |
|--------|--------|----------------------------------------------|
| SLL    | 5152   | 2                                            |
|        | 5037   | 2                                            |
|        |        |                                              |
| SHA    | 63     | 3                                            |
|        |        |                                              |
| SH     | 5137   | 4                                            |
|        | 5144   | 5                                            |
|        | 63     | 3                                            |
|        | 5340   | 2                                            |
|        | 5152   | 2                                            |
